# Supplementary material
Source: publisher figshare collection journal article supplement (https://springernature.figshare.com/ndownloader/files/13784531)
Supplement: Supplementary file [file 13784531]

(a)

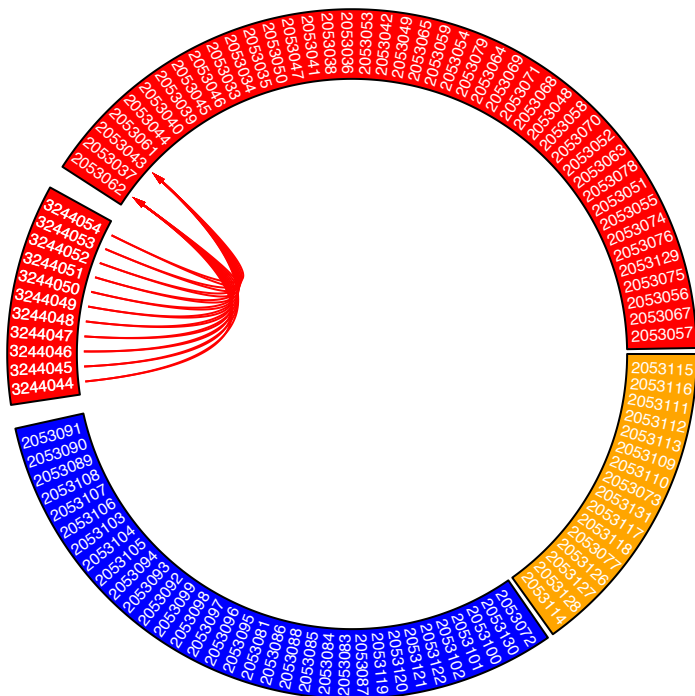

(c)

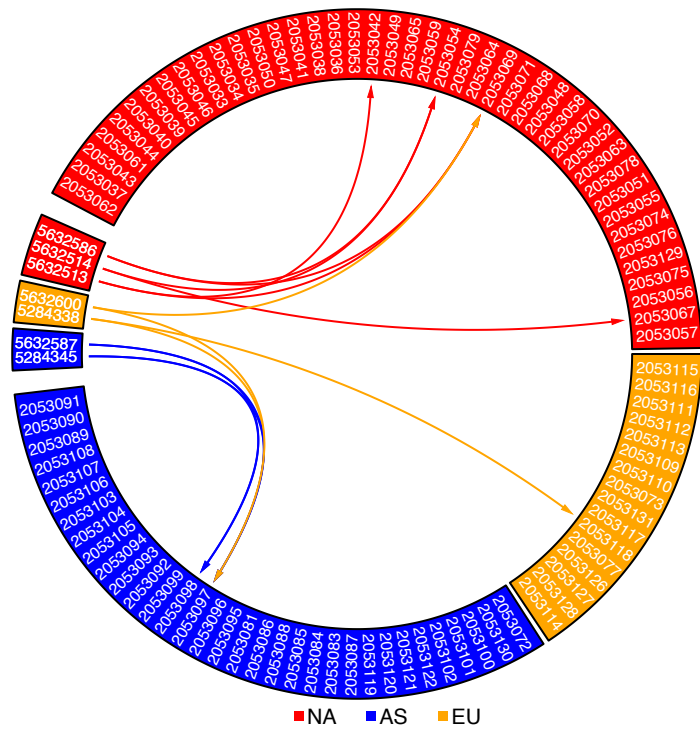

(b)

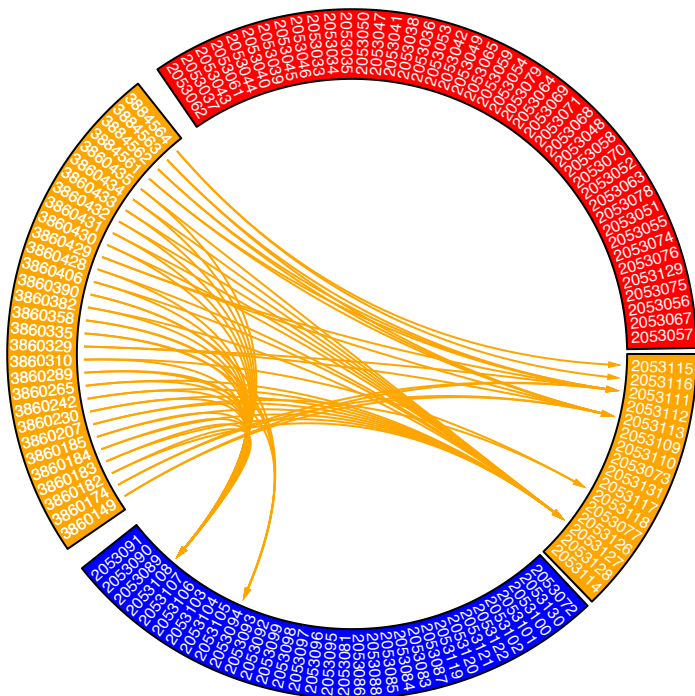

(A) Circular plots using the  $d_2^S$  dissimilarity

(a)

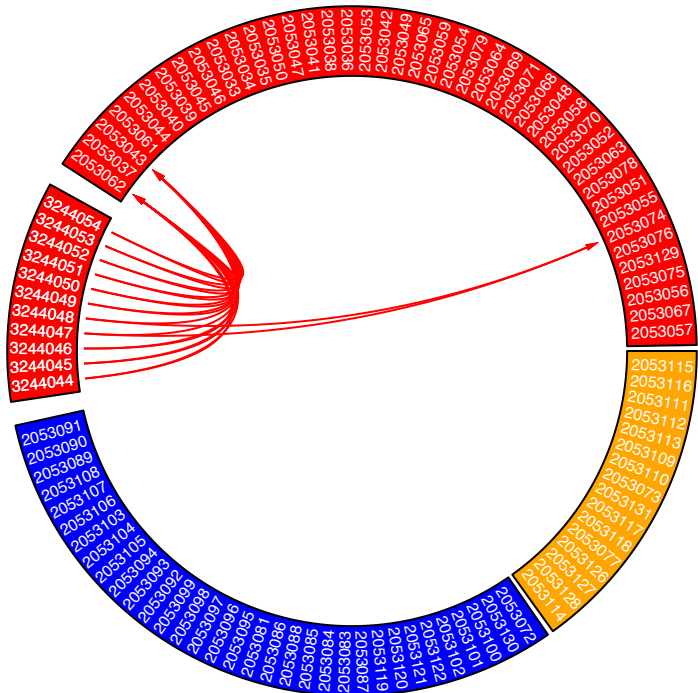

(c)

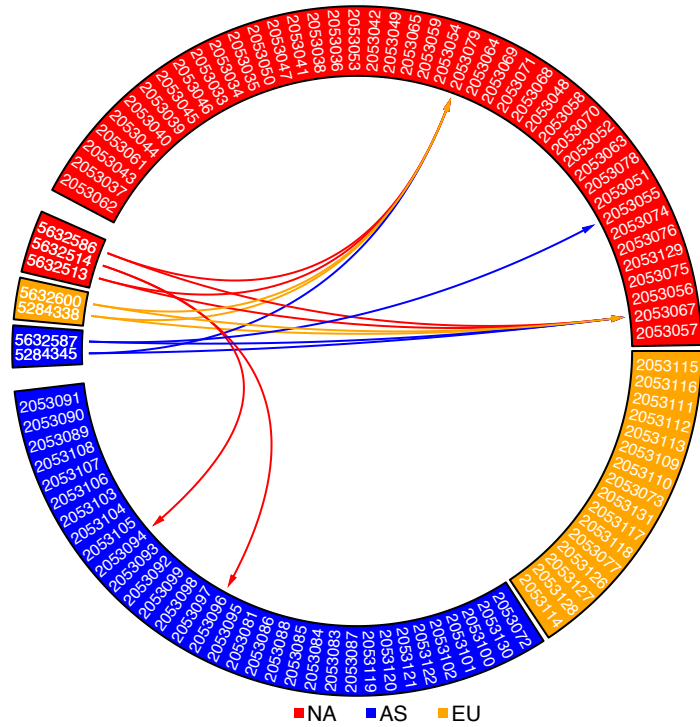

(b)

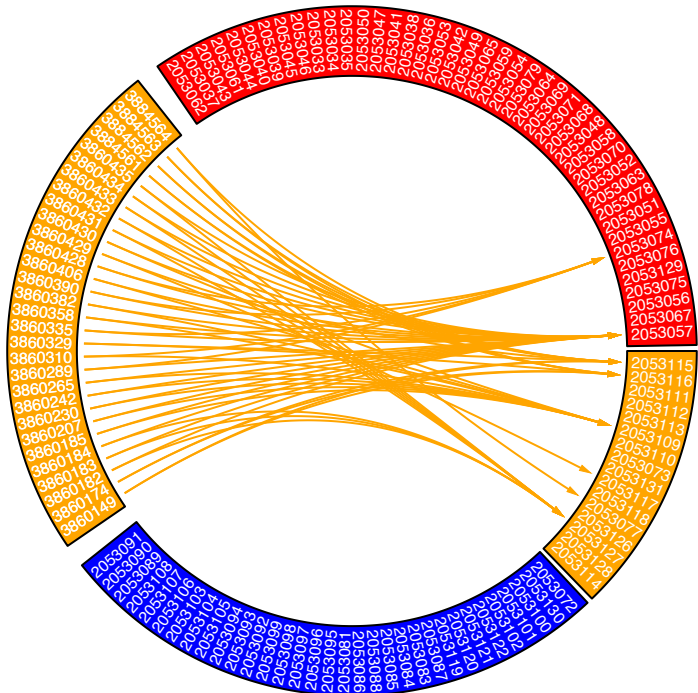

(B) Circular plots using the Manhattan distance
